# Supplementary material
Source: MDPI journal article supplement (https://www.mdpi.com/2304-6767/8/3/98)
Supplement: s1 [file s1]

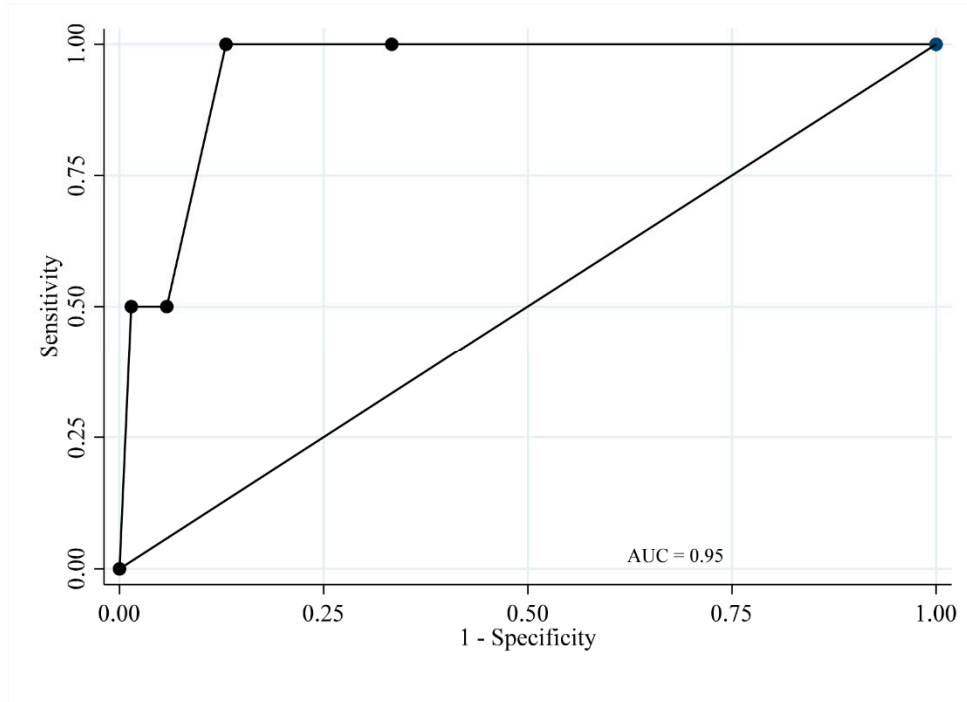

**Figure S1.** Receiver operating characteristic curve of the Trypsin-Like Peptidase Activity Assay Kit (TLP-AA-Kit) score for severe periodontitis among participants without a smoking habit, obesity, or diabetes.

**Table 1.** Sensitivity, specificity, correct classification, and positive and negative likelihood ratios of the TLP-AA-Kit score for severe periodontitis among participants without a smoking habit, obesity, or diabetes ( $n = 73$ ).

| TLP-AA-Kit Score Value | Sensitivity | Specificity | Classification | LR+   | LR-  |
|------------------------|-------------|-------------|----------------|-------|------|
| $\geq 1$               | 100%        | 0%          | 5.5%           | 1.00  |      |
| $\geq 1.5$             | 100%        | 66.7%       | 68.5%          | 3.00  | 0    |
| $\geq 2$               | 100%        | 87.0%       | 87.7%          | 7.67  | 0    |
| $\geq 2.5$             | 50.0%       | 94.2%       | 91.8%          | 8.63  | 0.53 |
| $\geq 3$               | 50.0%       | 98.6%       | 95.9%          | 34.50 | 0.51 |
| $> 3$                  | 0%          | 100%        | 94.5%          |       | 1.00 |

LR+ = positive likelihood ratio, LR- = negative likelihood ratio
